# Supplementary material for: Simple and Rapid Assembly of TALE Modules Based on the Degeneracy of the Codons and Trimer Repeats
Source: MDPI journal article supplement (doi:10.3390/genes12111761), 2021-11-05
Supplement: s1 [file s1]

A

CTTACACCGGATCAAGTTGTCGCTATTGCTTCTMACRDTGGTGGGAAGCAGGCATTGGAACCGTCCAGAGACTCCTTCCCGTGCTTTGCCAAGCTCATGGA  
L T P D Q V V A I A S ? ? G G K Q A L E T V Q R L L P V L C Q A H G  
CTGACTCCGGACCAAGTGGTGGCTATCGCCAGCMACRDTGGCGGCAAGCAAGCGCTCGAAACGGTGCAGCGGCTGTTGCCGGTGCTGTGCCAGGACCATGGC  
L T P D Q V V A I A S ? ? G G K Q A L E T V Q R L L P V L C Q A H G  
CTCACCCCCGATCAGGTCGTTGCAATCGCATCCMACRDTGGCGGAAAAACAAGCCCTGGAGACAGTGCAACGATTGCTGCCGGTCCTGTGTCAAGCACACGGC  
L T P D Q V V A I A S ? ? G G K Q A L E T V Q R L L P V L C Q A H G

B

| P1<br>P3 | A1  | T1  | C1  | G1  |
|----------|-----|-----|-----|-----|
| A3       | AAA | TAA | CAA | GAA |
| T3       | AAT | TAT | CAT | GAT |
| C3       | AAC | TAC | CAC | GAC |
| G3       | AAG | TAG | CAG | GAG |

| P1<br>P3 | A1  | T1  | C1  | G1  |
|----------|-----|-----|-----|-----|
| A3       | ATA | TTA | CTA | GTA |
| T3       | ATT | TTT | CTT | GTT |
| C3       | ATC | TTC | CTC | GTC |
| G3       | ATG | TTG | CTG | GTG |

| P1<br>P3 | A1  | T1  | C1  | G1  |
|----------|-----|-----|-----|-----|
| A3       | ACA | TCA | CCA | GCA |
| T3       | ACT | TCT | CCT | GCT |
| C3       | ACC | TCC | CCC | GCC |
| G3       | ACG | TCG | CCG | GCG |

| P1<br>P3 | A1  | T1  | C1  | G1  |
|----------|-----|-----|-----|-----|
| A3       | AGA | TGA | CGA | GGA |
| T3       | AGT | TGT | CGT | GGT |
| C3       | AGC | TGC | CGC | GGC |
| G3       | AGG | TGG | CGG | GGG |

C

First 6 modules

|          |     |     |     |     |     |     |
|----------|-----|-----|-----|-----|-----|-----|
| Primer F | 1F  | 2F  | 3F  | 4F  | 5F  | 6F  |
| Primer R | 1R  | 2R  | 3R  | 4R  | 5R  | 6R  |
| Mixture  | 3×1 | 3×2 | 3×3 | 3×4 | 3×5 | 3×6 |

Last modules

|          |     |     |     |     |     |     |     |     |     |     |     |     |
|----------|-----|-----|-----|-----|-----|-----|-----|-----|-----|-----|-----|-----|
| Primer F | 4F  | 4F  | 4F  | 5F  | 5F  | 5F  | 6F  | 6F  | 6F  | 7F  | 7F  | 7F  |
| Primer R | R+1 | R+2 | R+3 |
| Mixture  | Z10 | Z11 | Z12 | Z13 | Z14 | Z15 | Z16 | Z17 | Z18 | Z19 | Z20 | Z21 |

Supplementary Figure S1

X1X2, X3X4, X5X6 represent any combination of NI, NN, NG, HD respectively, there are altogether 64 kinds of combinations. MACRDT represents any combination of AACAAT, AACATT, AACGGT, CACGAT respectively, there are altogether 64 kinds of combinations.
