# Supplementary material for: Simple and Rapid Assembly of TALE Modules Based on the Degeneracy of the Codons and Trimer Repeats
Source: MDPI journal article supplement (doi:10.3390/genes12111761), 2021-11-05
Supplement: s1 [file s1]

**Supplementary Table S2. Sequences of primers used for triplet amplification**

| Prime<br>rs | Sequence                                                                |
|-------------|-------------------------------------------------------------------------|
| 1F          | CACTGACGGGTGCCCCCTGAACCTCACACCGGATCAAGTTGTCGCT                          |
| 1R          | TGAGGCCGTGTGCTTGACACAGGAC                                               |
| 2F          | GTGTCAAGCACACGGCCTCACACCGGATCAAGTTGTCGCT                                |
| 2R          | GACAACTTGATCCGGTGTAAGTCCGTGTGCTTGACACAGGAC                              |
| 3F          | ACTTACACCGGATCAAGTTGTCGCT                                               |
| 3R          | GGCGGGAGTCAAACCATGATCTTGACACAGGACCGGCAGC                                |
| 4F          | ATCATGGTTTGACTCCCGCCCAAGTTGTCGCTATTGCTTCT                               |
| 4R          | ATGGTCCTGGCACAACACTGGCAGCAATCGTTGCACTGTC                                |
| 5F          | CAGTGTTGTGCCAGGACCATGGGCTTACACCGGATCAAGTTGTCGCT                         |
| 5R          | ACAGAGGACGGGGAGCAGCCTTTGCACTGTCTCCAGGGCTTG                              |
| 6F          | AGGCTGCTCCCCGTCCTCTGTCAGGACCATGGGCTTACACCGGATCAAGTT                     |
| 6R          | GTCGCT<br>GCAGCAATCGTTGCACTGTC                                          |
| 7F          | GACAGTGCAACGATTGCTGCCTGTGCTGTGCCAAGATCATGGACTTACACC<br>GGATCAAGTTGTCGCT |
| R+1         | GCGAGATAACTGGGCAACAATGCTTTCCAATGCCGGCCTCCCACCA                          |
| R+2         | GCGAGATAACTGGGCAACAATGCTTTGAGCGCTGGCCTGCCGCCA                           |
| R+3         | GCGAGATAACTGGGCAACAATGCTCTCCAGGGCTGGTCTTCCGCCA                          |
