# Supplementary material for: Simple and Rapid Assembly of TALE Modules Based on the Degeneracy of the Codons and Trimer Repeats
Source: MDPI journal article supplement (doi:10.3390/genes12111761), 2021-11-05
Supplement: s1 [file s1]

**Supplementary Table S1. Sequences of primers used for generation of trimers**

| Primers      | Sequence                                                                                 |
|--------------|------------------------------------------------------------------------------------------|
| <b>T-F :</b> | GGTGGGAAGCAGGCATTGGAAACCGTCCAGAGACTCCTTCCCGTGCTTTGCCAAGCTCATGGACTGACTCCGGACCAAGT         |
| <b>T-R :</b> | GGATGCGATTGCAACGACCTGATCGGGGGTGAGGCCATGGTCCTGGCACAGCACCGGCAACAGCCGCTGCACCGTTTCGAG        |
| <b>A2 :</b>  | CTGACTCCGGACCAAGTGGTGGCTATCGCCAGCAACATTGGCGGCAAGCAAGCGCTCGAAACGGTG CAGCGG                |
| <b>T2 :</b>  | CTGACTCCGGACCAAGTGGTGGCTATCGCCAGCAACGGTGGCGGCAAGCAAGCGCTCGAAACGGTG CAGCGG                |
| <b>C2 :</b>  | CTGACTCCGGACCAAGTGGTGGCTATCGCCAGCCACGATGGCGGCAAGCAAGCGCTCGAAACGGTG CAGCGG                |
| <b>G2 :</b>  | CTGACTCCGGACCAAGTGGTGGCTATCGCCAGCAACAATGGCGGCAAGCAAGCGCTCGAAACGGTG CAGCGG                |
| <b>A1 :</b>  | CTTACACCGGATCAAGTTGTCGCTATTGCTTCTAACATTGGTGGGAAGCAGGCATTGG                               |
| <b>T1 :</b>  | CTTACACCGGATCAAGTTGTCGCTATTGCTTCTAACGGTGGTGGGAAGCAGGCATTGG                               |
| <b>C1 :</b>  | CTTACACCGGATCAAGTTGTCGCTATTGCTTCTCACGATGGTGGGAAGCAGGCATTGG                               |
| <b>G1 :</b>  | CTTACACCGGATCAAGTTGTCGCTATTGCTTCTAACATGGTGGGAAGCAGGCATTGG                                |
| <b>A3 :</b>  | GCCGTGTGCTTGACACAGGACCGGCAGCAATCGTTGCACTGTCTCCAGGGCTTGTTTTCCGCCAATG TTGGATGCGATTGCAACGAC |
| <b>T3 :</b>  | GCCGTGTGCTTGACACAGGACCGGCAGCAATCGTTGCACTGTCTCCAGGGCTTGTTTTCCGCCACCG TTGGATGCGATTGCAACGAC |
| <b>C3 :</b>  | GCCGTGTGCTTGACACAGGACCGGCAGCAATCGTTGCACTGTCTCCAGGGCTTGTTTTCCGCCATCG TGGGATGCGATTGCAACGAC |
| <b>G3 :</b>  | GCCGTGTGCTTGACACAGGACCGGCAGCAATCGTTGCACTGTCTCCAGGGCTTGTTTTCCGCCATTG TTGGATGCGATTGCAACGAC |
